# Supplementary material
Source: MDPI journal article supplement (https://www.mdpi.com/1999-4907/15/3/396)
Supplement: s1 [file s1]

## SUPPLEMENTARY MATERIALS

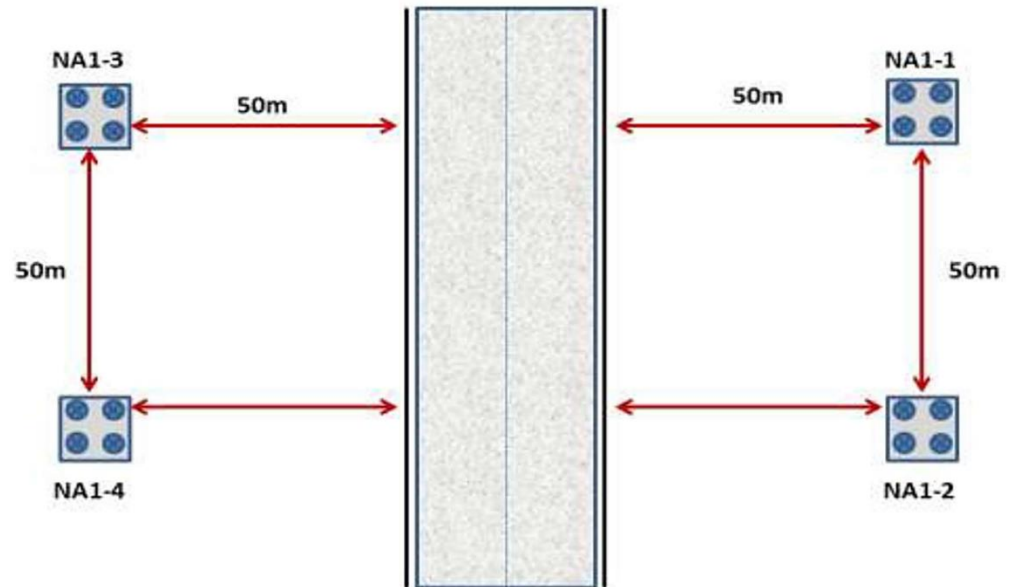

**Figure S1.** Covering area of each sampling site and its corresponding features (not to scale). Each sampling site was represented by an area of approximately. 100 m × 50 m with four independent sample locations (a virtual 1 m<sup>2</sup> quadrant) at the corners of the oblong. It is crossed in its length by a road of ca. 6 m wide. At each of the four independent sample locations, four topsoil cores (2 cm in diameter and 5 cm in depth) (pseudo-replicate samples) were collected, pooled together, and homogenized into a composite sample of approximately 25 g (replicate sample). Four independent replicate samples (4 × 25 g) obtained from four sample locations at each sampling site were kept in a labeled sterile plastic bag and formed an independent soil sample (Taken from Gnangui et al., 2021 [1]).

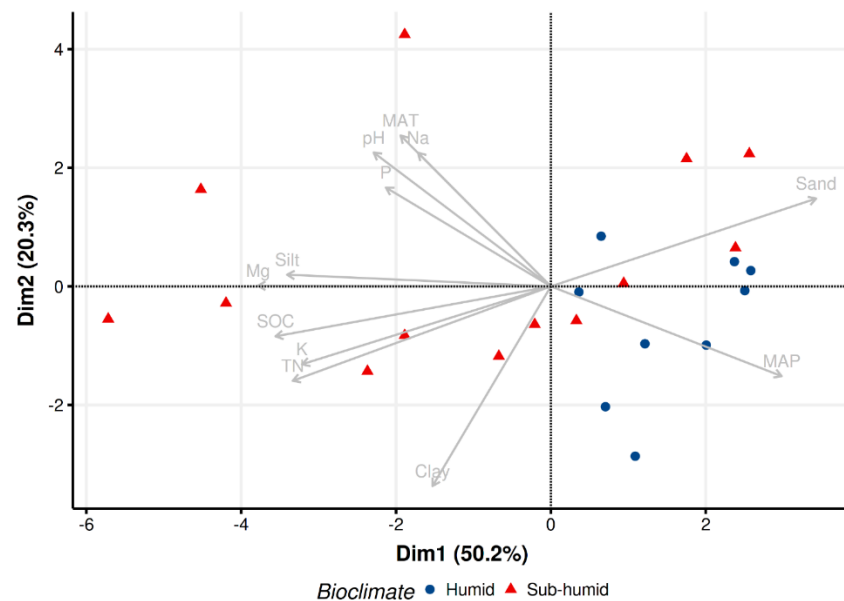

**Figure S2.** Principal component analysis of the environmental data. Sampled sites are colored according to bioclimates.

**Table S1.** Average ASV abundance and occurrence per phylum.

| Phylum                      | Average ASV Percentage (%) | Occurrence (%) |
|-----------------------------|----------------------------|----------------|
| Proteobacteria              | 29.76                      | 100            |
| Acidobacteria               | 15.45                      | 100            |
| Actinobacteria              | 14.18                      | 100            |
| Bacteroidetes               | 9.29                       | 100            |
| Planctomycetes              | 8.42                       | 100            |
| Chloroflexi                 | 6.47                       | 100            |
| Verrucomicrobia             | 5.11                       | 100            |
| candidate division WPS-1    | 2.59                       | 100            |
| Firmicutes                  | 2.52                       | 100            |
| Thaumarchaeota              | 1.93                       | 100            |
| Gemmatimonadetes            | 1.05                       | 100            |
| Armatimonadetes             | 0.6                        | 100            |
| Cyanobacteria/Chloroplast   | 0.45                       | 95.45          |
| Latescibacteria             | 0.43                       | 100            |
| Pacearchaeota               | 0.34                       | 50             |
| candidate division WPS-2    | 0.31                       | 77.27          |
| Nitrospirae                 | 0.29                       | 100            |
| Chlamydiae                  | 0.19                       | 63.63          |
| Ignavibacteriae             | 0.18                       | 72.72          |
| Euryarchaeota               | 0.16                       | 63.63          |
| Crenarchaeota               | 0.14                       | 4.54           |
| Diapherotrites              | 0.14                       | 4.54           |
| Elusimicrobia               | 0.13                       | 72.72          |
| Synergistetes               | 0.13                       | 86.36          |
| Parcubacteria               | 0.12                       | 22.72          |
| Thermodesulfobacteria       | 0.12                       | 63.63          |
| Aquificae                   | 0.11                       | 54.54          |
| Woesearchaeota              | 0.11                       | 31.81          |
| Deinococcus-Thermus         | 0.1                        | 72.72          |
| Acetothermia                | 0.09                       | 27.27          |
| BRC1                        | 0.09                       | 31.81          |
| Candidatus Saccharibacteria | 0.09                       | 13.63          |
| Chlorobi                    | 0.08                       | 9.09           |
| Microgenomates              | 0.08                       | 31.81          |
| Omnitrophica                | 0.08                       | 54.54          |
| Aenigmarchaeota             | 0.07                       | 9.09           |
| Chrysiogenetes              | 0.07                       | 50             |
| Deferribacteres             | 0.07                       | 4.54           |
| Hydrogenedentes             | 0.07                       | 18.18          |
| Spirochaetes                | 0.07                       | 18.18          |
| Thermotogae                 | 0.07                       | 9.09           |
| candidate division ZB3      | 0.07                       | 9.09           |
| Cloacimonetes               | 0.06                       | 4.54           |

**Table S2.** Total variation of microbial phylum explained by physicochemical properties and climatic variables.

| Phylum                    | SOC    | TN    | Mg     | Clay    | MAT    | pH       | K      | Na      | MAP      | Silt    | P        | Residuals |
|---------------------------|--------|-------|--------|---------|--------|----------|--------|---------|----------|---------|----------|-----------|
| Actinobacteria            | 0.066  | 0.268 | 0.032  | 0.183   | 0.0008 | 1.87E-05 | 0.011  | 0.00074 | 0.005    | 0.00033 | 0.053    | 0.378     |
| Acidobacteria             | 0.082  | 0.057 | 0.294  | 0.00027 | 0.0015 | 0.029    | 0.004  | 0.00073 | 0.002    | 0.016   | 0.0061   | 0.505     |
| Proteobacteria            | 0.0001 | 0.126 | 0.271  | 0.01    | 0.01   | 0.02     | 0.016  | 0.0071  | 0.023    | 0.0017  | 0.0137   | 0.497     |
| Bacteroidetes             | 0.122  | 0.080 | 0.0179 | 0.047   | 0.078  | 0.00016  | 0.136  | 0.00089 | 0.0017   | 0.0023  | 0.0014   | 0.510     |
| Firmicutes                | 0.038  | 0.001 | 0.062  | 0.090   | 0.002  | 0.0215   | 0.102  | 0.062   | 0.00018  | 0.017   | 0.00021  | 0.599     |
| Planctomycetes            | 0.143  | 0.213 | 0.063  | 0.0033  | 0.109  | 0.0234   | 0.0015 | 0.0068  | 0.014    | 0.0016  | 0.0012   | 0.417     |
| candidate division WPS-1  | 0.270  | 0.268 | 0.0083 | 0.057   | 0.034  | 3.59E-05 | 0.0012 | 0.00059 | 0.0042   | 0.00019 | 0.023    | 0.331     |
| Nitrospirae               | 0.156  | 0.025 | 0.129  | 0.034   | 0.013  | 0.053    | 0.019  | 0.042   | 0.005    | 0.035   | 7.04E-05 | 0.483     |
| Chloroflexi               | 0.154  | 0.133 | 0.021  | 0.0034  | 0.111  | 0.0014   | 0.0016 | 0.0047  | 2.27E-05 | 0.014   | 0.0019   | 0.55      |
| Verrucomicrobia           | 0.051  | 0.329 | 0.165  | 0.062   | 0.006  | 0.011    | 0.0019 | 0.0015  | 0.0093   | 0.002   | 0.00074  | 0.357     |
| Thaumarchaeota            | 0.012  | 0.030 | 0.049  | 0.067   | 0.095  | 0.056    | 0.022  | 0.010   | 0.00033  | 0.107   | 0.043    | 0.503     |
| Cyanobacteria/Chloroplast | 0.156  | 0.111 | 0.010  | 0.039   | 0.112  | 0.019    | 0.0015 | 0.024   | 0.023    | 0.005   | 0.0163   | 0.478     |
| candidate division WPS-2  | 0.118  | 0.042 | 0.007  | 0.129   | 0.092  | 0.055    | 0.098  | 0.04    | 0.015    | 0.003   | 0.001    | 0.394     |

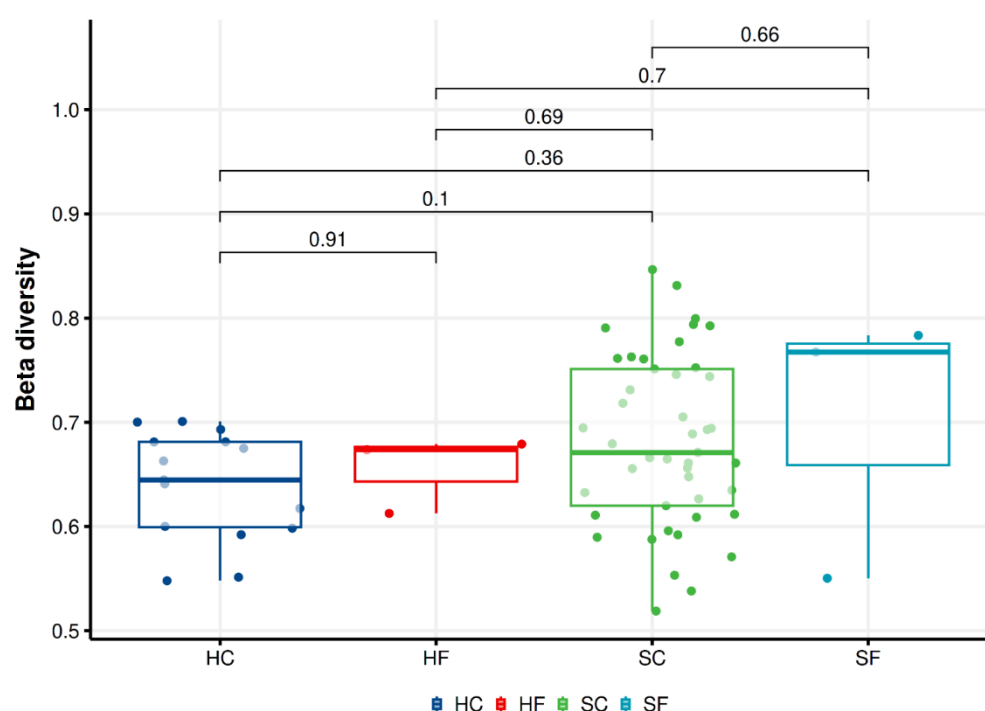

**Figure S3.** Beta diversity per soil type with multiple pairwise comparisons. Soil types are HC: Humid and cropland, HF: Humid and forest land, SC: Sub-humid and cropland and SF: sub-humid and forest land.

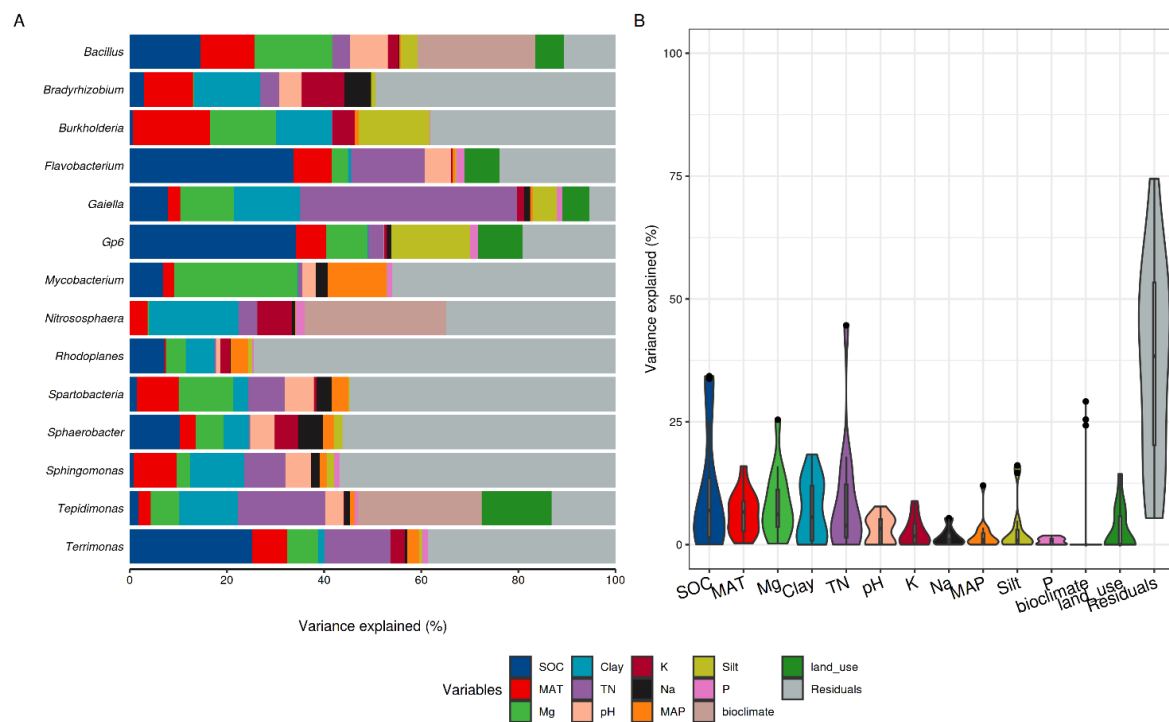

**Figure S4.** Variance partitioning of core genus across forest soil ecosystem. **(A)** Total variance for each genus is partitioned into the fraction due to environmental properties. **(B)** Violin and box plot of percent variation in genus diversity explained by each variable.

## References

1. Gnangui, S.L.E.; Fossou, R.K.; Ebou, A.; Amon, C.E.R.; Koua, D.K.; Kouadjo, C.G.Z.; Cowan, D.A.; Zézé, A. The Rhizobial Microbiome from the Tropical Savannah Zones in Northern Côte d'Ivoire. *Microorganisms* **2021**, *9*, 1842. <https://doi.org/10.3390/microorganisms9091842>.
